# Supplementary material
Source: HighWire-hosted journal article supplement (https://thorax.bmj.com/highwire/filestream/174259/field_highwire_adjunct_files/0/5810861.pdf)
Supplement: 5810861.pdf [file 5810861.pdf]

## Contents of the spirometry training programme for general practitioners and practice assistants

| General practitioners*                                                                                                                                                                |      | Practice assistants                                                                                                                                               |      |
|---------------------------------------------------------------------------------------------------------------------------------------------------------------------------------------|------|-------------------------------------------------------------------------------------------------------------------------------------------------------------------|------|
| First training session                                                                                                                                                                | Time |                                                                                                                                                                   | Time |
| <ul style="list-style-type: none"> <li>• General aspects of COPD and asthma (e.g. pathophysiology, epidemiology)</li> <li>• Indications for spirometry in general practice</li> </ul> | 30'  | <ul style="list-style-type: none"> <li>• General aspects of COPD and asthma (e.g. basic pathophysiology, treatment)</li> </ul>                                    | 30'  |
| <ul style="list-style-type: none"> <li>• Physiology of the respiratory system, spirometric indices, flow/volume curve</li> </ul>                                                      | 40'  | <ul style="list-style-type: none"> <li>• Basics of respiratory physiology, spirometric indices, flow/volume curve</li> </ul>                                      | 20'  |
| <ul style="list-style-type: none"> <li>• Basic aspects of spirometry test performance (measurement technique)<sup>†</sup></li> </ul>                                                  | 20'  | <ul style="list-style-type: none"> <li>• Basic aspects of spirometry test performance (measurement technique)<sup>†,‡</sup></li> </ul>                            | 30'  |
| <ul style="list-style-type: none"> <li>• Demonstration of Microloop spirometer and Spirare software</li> </ul>                                                                        | 15'  | <ul style="list-style-type: none"> <li>• Demonstration of Microloop spirometer and Spirare software</li> </ul>                                                    | 15'  |
| <ul style="list-style-type: none"> <li>• Practising pre-bronchodilator spirometry in small groups</li> </ul>                                                                          | 30'  | <ul style="list-style-type: none"> <li>• Practising pre-bronchodilator spirometry in small groups</li> </ul>                                                      | 55'  |
|                                                                                                                                                                                       | +    |                                                                                                                                                                   | +    |
|                                                                                                                                                                                       | 150' |                                                                                                                                                                   | 150' |
| Second training session                                                                                                                                                               |      |                                                                                                                                                                   |      |
| <ul style="list-style-type: none"> <li>• Summary of first session</li> </ul>                                                                                                          | 30'  | <ul style="list-style-type: none"> <li>• Summary of first session</li> </ul>                                                                                      | 25'  |
| <ul style="list-style-type: none"> <li>• Interpretation of spirometric indices and flow-volume curves</li> </ul>                                                                      | 40'  | <ul style="list-style-type: none"> <li>• Sharing experiences and problems encountered with spirometry in practice</li> </ul>                                      | 15'  |
| <ul style="list-style-type: none"> <li>• Review of clinical case examples</li> </ul>                                                                                                  | 60'  | <ul style="list-style-type: none"> <li>• Basic aspects of spirometry test performance (measurement technique)<sup>†,§</sup></li> </ul>                            | 20'  |
| <ul style="list-style-type: none"> <li>• Implementation and organisation of spirometry</li> </ul>                                                                                     | 20'  | <ul style="list-style-type: none"> <li>• Aspects of inhalation technique, instruction on use of Volumatic spacer and salbutamol pMDI, incl. practising</li> </ul> | 30'  |
|                                                                                                                                                                                       | +    | <ul style="list-style-type: none"> <li>• Practising pre- and post-bronchodilator spirometry in small groups</li> </ul>                                            | 60'  |
|                                                                                                                                                                                       | 150' |                                                                                                                                                                   | 150' |

\*Instructors in GP course: pulmonologist, pulmonary physiologist, general practitioner, lung function technician; instructors in practice assistant course: pulmonary physiologist, general practitioner, lung function technician

<sup>†</sup>Special attention for errors commonly made during spirometry in general practice {1959} {2459} and markers of acceptability and reproducibility of manoeuvres {2183}

<sup>‡</sup>A videotape with examples of both good and bad subject instruction and execution of spirometry tests was used

<sup>§</sup>Special attention for judging the flow-volume curve with respect to acceptability of manoeuvres

pMDI = pressurised metered dose inhaler.
